# Supplementary material for: Quantifying the Effect of Ribosomal Density on mRNA Stability
Source: PubMed Central journal article supplement (PMC4096589; doi:10.1371/journal.pone.0102308), 2014-07-14
Supplement: pone.0102308.s012.pdf [file pone.0102308.s012.pdf]

|                         | Reference | Oxidative stress                     | MMS stress                           |
|-------------------------|-----------|--------------------------------------|--------------------------------------|
| <b>Reference</b>        | <i>1</i>  | <i>0.8014 (&lt;10<sup>-08</sup>)</i> | <i>0.6292 (&lt;10<sup>-09</sup>)</i> |
| <b>Oxidative stress</b> |           | <i>1</i>                             | <i>0.5497 (&lt;10<sup>-09</sup>)</i> |
| <b>MMS stress</b>       |           |                                      | <i>1</i>                             |
