# Supplementary material for: Quantifying the Effect of Ribosomal Density on mRNA Stability
Source: PubMed Central journal article supplement (PMC4096589; doi:10.1371/journal.pone.0102308), 2014-07-14
Supplement: pone.0102308.s013.pdf [file pone.0102308.s013.pdf]

|                               | Reference | Oxidative stress                     | MMS stress                           | Natural mRNA                      | Shortened Poly(A) tail                |
|-------------------------------|-----------|--------------------------------------|--------------------------------------|-----------------------------------|---------------------------------------|
| <b>Reference</b>              | <i>1</i>  | <i>0.8014 (&lt;10<sup>-08</sup>)</i> | <i>0.6292 (&lt;10<sup>-09</sup>)</i> | <i>0.4240 (10<sup>-174</sup>)</i> | <i>0.4021 (10<sup>-185</sup>)</i>     |
| <b>Oxidative stress</b>       | <i>1</i>  |                                      | <i>0.5497 (&lt;10<sup>-09</sup>)</i> | <i>0.3762 (10<sup>-136</sup>)</i> | <i>0.3731 (10<sup>-159</sup>)</i>     |
| <b>MMS stress</b>             |           |                                      | <i>1</i>                             | <i>0.2861 (10<sup>-73</sup>)</i>  | <i>0.3102 (10<sup>-103</sup>)</i>     |
| <b>Natural mRNA</b>           |           |                                      |                                      | <i>1</i>                          | <i>0.6226 (&lt;10<sup>-323</sup>)</i> |
| <b>Shortened Poly(A) tail</b> |           |                                      |                                      |                                   | <i>1</i>                              |
