# Supplementary material for: Quantifying the Effect of Ribosomal Density on mRNA Stability
Source: PubMed Central journal article supplement (PMC4096589; doi:10.1371/journal.pone.0102308), 2014-07-14
Supplement: pone.0102308.s014.pdf [file pone.0102308.s014.pdf]

|                                 | <b>Brar, 2012</b> | <b>Ingolia, 2009</b>                  | <b>Wang, 2002</b>                     |
|---------------------------------|-------------------|---------------------------------------|---------------------------------------|
| <b>Brar et al.,<br/>2012</b>    | <i>1</i>          | <i>0.6193 (&lt;10<sup>-323</sup>)</i> | <i>0.5884 (&lt;10<sup>-323</sup>)</i> |
| <b>Ingolia et al.,<br/>2009</b> |                   | <i>1</i>                              | <i>0.7378 (&lt;10<sup>-324</sup>)</i> |
| <b>Wang et al.,<br/>2002</b>    |                   |                                       | <i>1</i>                              |
