# Supplementary material for: Quantifying the Effect of Ribosomal Density on mRNA Stability
Source: PubMed Central journal article supplement (PMC4096589; doi:10.1371/journal.pone.0102308), 2014-07-14
Supplement: pone.0102308.s015.pdf [file pone.0102308.s015.pdf]

| <b>GO</b>                 | <b>RD ORF 5' end</b><br><i>P-value &gt; 0.05</i>                                                                                                                                                                                                                                                                                                                                                                                                                                                                                | <b>RD ORF 3' end</b><br><i>P-value &gt; 0.05</i>                                                                                                                                                                                                                                                                                                                                                                                                |
|---------------------------|---------------------------------------------------------------------------------------------------------------------------------------------------------------------------------------------------------------------------------------------------------------------------------------------------------------------------------------------------------------------------------------------------------------------------------------------------------------------------------------------------------------------------------|-------------------------------------------------------------------------------------------------------------------------------------------------------------------------------------------------------------------------------------------------------------------------------------------------------------------------------------------------------------------------------------------------------------------------------------------------|
| <b>Cellular component</b> | None                                                                                                                                                                                                                                                                                                                                                                                                                                                                                                                            | <ul style="list-style-type: none"> <li>• Endoplasmic reticulum</li> <li>• Ribosome</li> </ul>                                                                                                                                                                                                                                                                                                                                                   |
| <b>Molecular function</b> | <ul style="list-style-type: none"> <li>• GTPase activity</li> <li>• Histone binding</li> <li>• Hydrolase activity, acting on carbon-nitrogen (but not peptide) bonds</li> <li>• Phosphatase activity</li> <li>• Protein binding, bridging</li> <li>• Signal transducer activity</li> <li>• Small conjugating protein binding</li> <li>• Structural constituent of ribosome</li> <li>• Transcription factor binding</li> <li>• Transferase activity, transferring glycosyl groups</li> <li>• Unfolded protein binding</li> </ul> | <ul style="list-style-type: none"> <li>• ATPase activity</li> <li>• DNA binding</li> <li>• GTPase activity</li> <li>• Histone binding</li> <li>• Hydrolase activity, acting on carbon-nitrogen (but not peptide) bonds</li> <li>• Protein binding, bridging</li> <li>• Protein transporter activity</li> <li>• Signal transducer activity</li> <li>• Small conjugating protein binding</li> <li>• Structural constituent of ribosome</li> </ul> |
| <b>Biological process</b> | <ul style="list-style-type: none"> <li>• Golgi vesicle transport</li> <li>• Carbohydrate transport</li> <li>• Conjugation</li> <li>• Endocytosis</li> <li>• Meiotic cell cycle</li> <li>• Membrane invagination</li> <li>• Nucleus organization</li> <li>• Organelle inheritance</li> </ul>                                                                                                                                                                                                                                     | <ul style="list-style-type: none"> <li>• Golgi vesicle transport</li> <li>• RNA modification</li> <li>• Carbohydrate transport</li> <li>• Cell budding</li> <li>• Cellular ion homeostasis</li> <li>• Cellular respiration</li> <li>• Chromosome segregation</li> <li>• Endocytosis</li> </ul>                                                                                                                                                  |

- Protein glycosylation
- Response to heat
- snoRNA processing
- sporulation
- tRNA processing
- Transcription from RNA polymerase III promoter
- Translational initiation
- Transposition
- Vitamin metabolic process
- exocytosis
- Generation of precursor metabolites and energy
- Lipid metabolic process
- Lipid transport
- Meiotic cell cycle
- Membrane invagination
- Mitochondrial translation
- Mitochondrion organization
- Nucleus organization
- Organelle inheritance
- Peroxisome organization
- Protein maturation
- Response to heat
- snoRNA processing
- tRNA processing
- Transcription from RNA polymerase I promoter
- Transcription from RNA polymerase III promoter
- Transposition
