# Supplementary material for: Quantifying the Effect of Ribosomal Density on mRNA Stability
Source: PLoS One. 2014 Jul 14;9(7):e102308. doi: 10.1371/journal.pone.0102308 (PMC4096589; doi:10.1371/journal.pone.0102308)
Supplement: Table S5 — The functional genes groups of the three GO. For each GO the names of the functional genes groups are listed, as well as the number of analyzed genes in each group out of the 1,525 highly translated genes. (XLSX) [file pone.0102308.s016.xlsx]

## Sheet: Sheet1
	Biological process		Molecular Function		Cellular Component
	Group name	Number of analyzed genes	Group name	Number of analyzed genes	Group name	Number of analyzed genes
1	DNA recombination	14	ATPase activity	83	Golgi apparatus	63
2	DNA repair	35	DNA binding	48	cell cortex	49
3	DNA replication	19	GTPase activity	26	cell wall	37
4	DNA-dependent transcription, elongation	32	RNA binding	136	cellular bud	62
5	DNA-dependent transcription, initiation	23	cytoskeletal protein binding	30	chromosome	48
6	DNA-dependent transcriptio, termination	15	enzyme binding	20	cytoplasm	1192
7	Golgi vesicle transport	75	enzyme regulator activity	68	cytoplasmic membrane-bounded vesicle	48
8	RNA catabolic process	40	helicase activity	20	cytoskeleton	61
9	RNA modification	31	histone binding	8	endomembrane system	155
10	RNA splicing	22	hydrolase activity,a cting on carbon-nitrogen (but not peptide) bonds	16	endoplasmic reticulum	172
11	amino acid transport	12	hydrolase activity, acting on glycosyl bonds	12	extracellular region	11
12	carbohydrate metabolic process	87	ion binding	61	membrane	458
13	carbohydrate transport	3	isomerase activity	30	microtubule organizing center	9
14	cell budding	25	kinase activity	31	mitochondrial envelope	123
15	cell morphogenesis	8	ligase activity	58	mitochondrion	350
16	cell wall organization or biogenesis	61	lipid binding	30	nucleolus	141
17	cellular amino acid metabolic process	127	lyase activity	36	nucleus	547
18	cellular ion homeostasis	45	mRNA binding	32	peroxisome	10
19	cellular respiration	29	methyltransferase activity	23	plasma membrane	98
20	chromatin organization	49	nuclease activity	6	ribosome	150
21	chromosome segregation	17	nucleic acid binding transcription factor activity	10	site of polarized growth	78
22	cofactor metabolic process	53	nucleotidyltransferase activity	31	vacuole	69
23	conjugation	28	oxidoreductase activity	129
24	cytokinesis	36	peptidase activity	30
25	cytoplasmic translation	69	phosphatase activity	19
26	cytoskeleton organization	70	protein binding transcription factor activity	28
27	endocytosis	39	protein binding, bridging	18
28	endosomal transport	20	protein transporter activity	29
29	exocytosis	15	rRNA binding	13
30	generation of precursor metabolites and energy	51	signal transducer activity	8
31	histone modification	20	small conjugating protein binding	14
32	invasive growth in response to glucose limitation	8	structural constituent of ribosome	82
33	ion transport	65	structural molecule activity	118
34	lipid metabolic process	84	transcription factor binding	9
35	lipid transport	11	transferase activity, transferring acyl groups	37
36	mRNA processing	35	transferase activity, transferring alkyl or aryl (other than methyl) groups	12
37	meiotic cell cycle	4	transferase activity, transferring glycosyl groups	38
38	membrane fusion	27	translation factor activity, nucleic acid binding	28
39	membrane invagination	10	transmembrane transporter activity	96
40	mitochondrial translation	36	unfolded protein binding	33
41	mitochondrion organization	104
42	mitotic cell cycle	44
43	nuclear transport	82
44	nucleobase-containing compound transport	44
45	nucleobase-containing small molecule metabolic process	90
46	nucleus organization	15
47	oligosaccharide metabolic process	9
48	organelle assembly	32
49	organelle fission	25
50	organelle fusion	16
51	organelle inheritance	25
52	peptidyl-amino acid modification	24
53	peroxisome organization	7
54	protein acylation	14
55	protein alkylation	12
56	protein complex biogenesis	92
57	protein dephosphorylation	10
58	protein folding	51
59	protein glycosylation	29
60	protein lipidation	6
61	protein maturation	7
62	protein modification by small protein conjugation or removal	39
63	protein phosphorylation	29
64	protein targeting	89
65	proteolysis involved in cellular protein catabolic process	71
66	pseudohyphal growth	9
67	rRNA processing	123
68	regulation of DNA metabolic process	14
69	regulation of cell cycle	35
70	regulation of organelle organization	39
71	regulation of protein modification process	21
72	regulation of translation	41
73	regulation of transport	17
74	response to DNA damage stimulus	49
75	response to chemical stimulus	92
76	response to heat	13
77	response to osmotic stress	20
78	response to oxidative stress	36
79	response to starvation	14
80	ribosomal large subunit biogenesis	52
81	ribosomal small subunit biogenesis	65
82	ribosomal subunit export from nucleus	30
83	ribosome assembly	27
84	signaling	44
85	snoRNA processing	15
86	sporulation	23
87	tRNA aminoacylation for protein translation	22
88	tRNA processing	26
89	telomere organization	9
90	transcription from RNA polymerase I promoter	32
91	transcription from RNA polymerase II promoter	87
92	transcription from RNA polymerase III promoter	21
93	translational elongation	21
94	translational initiation	32
95	transmembrane transport	68
96	transposition	2
97	vacuole organization	25
98	vesicle organization	29
99	vitamin metabolic process	8
